# Supplementary material for: (S)-BINOL-based boronic ester fluorescence sensors for enantioselective recognition of α-phenylethylamine and phenylglycinol
Source: Royal Society of Chemistry journal article supplement (doi:10.1039/c3ra45682j), 2013-11-19
Supplement: c3ra45682j.pdf [file c3ra45682j.pdf]

Electronic Supporting Information

**(S)-BINOL-based boronic ester fluorescence sensors for  
enantioselective recognition of  $\alpha$ -phenyl ethylamine and  
phenylglycinol**

Jiemin Jiao, Guo Wei, Fei Li, Xuerong Mao, Yixiang Cheng\*, Chengjian Zhu\*

Key Lab of Mesoscopic Chemistry of MOE, School of Chemistry and Chemical Engineering,  
Nanjing University, Nanjing 210093, China

E-mail: yxcheng@nju.edu.cn and cjzhu@nju.edu.cn

**Contents:**

- 1. Enantioselective Recognition of (S)-L1, and (S)-L2 with  $\alpha$ -phenyl ethylamine and phenylglycinol.**
- 2. Fluorescence spectrum of (S)-L1 with other guest molecules.**
- 3. Fluorescence spectrum of (S)-L2 with other guest molecules.**
- 4. NMR spectra.**
- 5. IR spectra and Mass.**
- 6.  $^1\text{H}$  NMR study of (S)-L1 and (S)-L2**
- 7. UV-vis spectrum of (S)-L2 with phenyl amine**

## 1. Enantioselective Recognition of (*S*)-L1, and (*S*)-L2 with $\alpha$ -phenyl ethylamine and phenylglycinol.

$1.0 \times 10^{-5}$  M solution of host compounds (*S*)-L1 and (*S*)-L2 in toluene, 0.01 M solution of (*R*)/(*S*)-phenyl ethylamine and (*L*)/(*D*)-phenylglycinol in THF were freshly prepared for each measurement. The resulting solution was allowed to stand at room temperature for 4 h before the fluorescence measurement.

### 1.1 Investigation of (*S*)-L1 with (*R*)/(*S*)-phenyl ethylamine

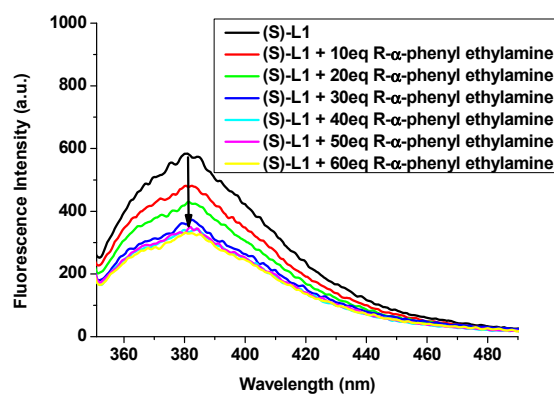

Figure S1. Fluorescence spectra of (*S*)-L1 with different molar ratio of (*R*)- $\alpha$ -phenyl ethylamine

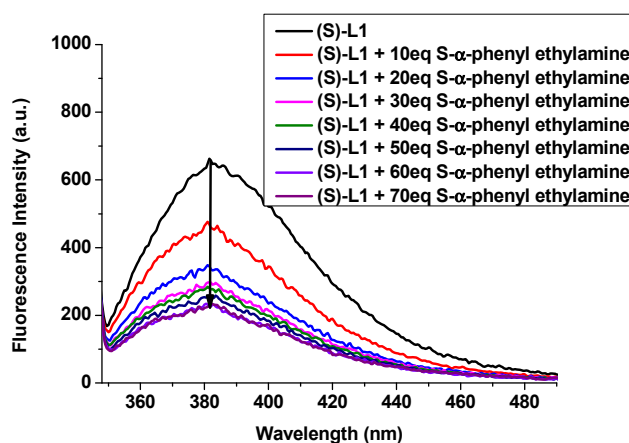

Figure S2. Fluorescence spectra of (*S*)-L1 with different molar ratio of (*S*)- $\alpha$ -phenyl ethylamine

## 1.2 Investigation of (S)-L1 with (L)/(D)-phenylglycinol

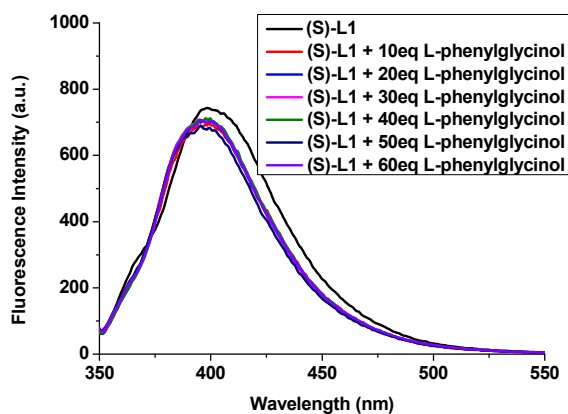

Figure S3. Fluorescence spectra of (S)-L1 with different molar ratio of (L)-phenylglycinol.

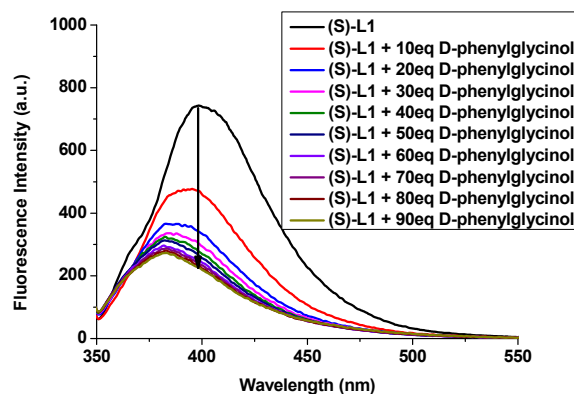

Figure S4. Fluorescence spectra of (S)-L1 with different molar ratio of (D)-phenylglycinol.

## 1.3 Investigation of (S)-L2 with (R)- $\alpha$ -phenyl ethylamine

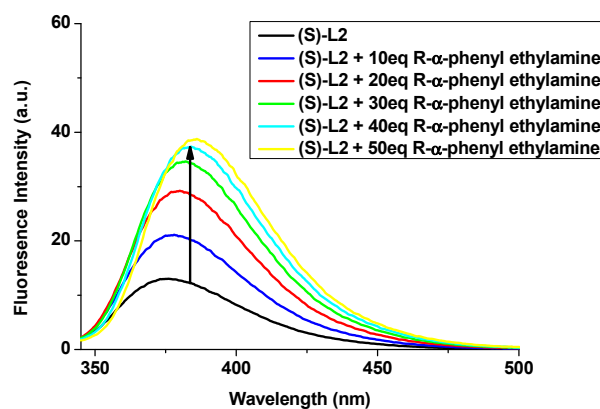

Figure S5. Fluorescence spectra of (S)-L2 with different molar ratio of (R)- $\alpha$ -phenyl ethylamine

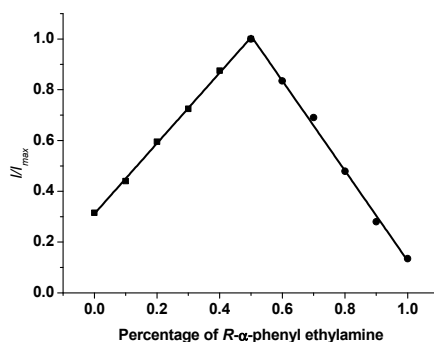

**Figure S6.** Fluorescence Jobs plot of (*S*)-**L2** and (*R*)-α-phenyl ethylamine. Total concentration of (*S*)-**L2** and (*R*)-phenyl ethylamine is  $5.0 \times 10^{-5}$  M.

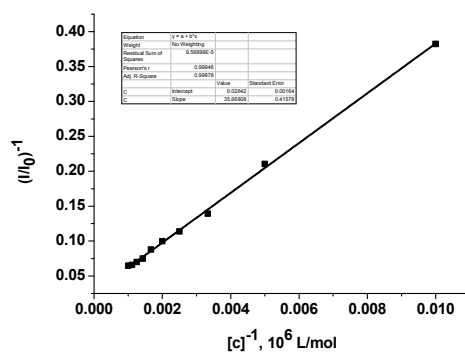

**Figure S7.** Relationship between  $(I-I_0)^{-1}$  and  $[c]^{-1}$ . I: fluorescence intensity of (*S*)-**L2** with (*R*)-α-phenyl ethylamine.  $I_0$ : fluorescence intensity of (*S*)-**L2** without (*R*)-α-phenyl ethylamine ( $1.0 \times 10^{-5}$  M in toluene); [c]: concentration of (*R*)-α-phenyl ethylamine in mixed solution.

**Table S1.** Parameter of the fitting curve in Fig S7

|                         |                     |          |                |
|-------------------------|---------------------|----------|----------------|
| Equation                | $y = a + b \cdot x$ |          |                |
| Weight                  | No Weighting        |          |                |
| Residual Sum of Squares | 9.56899E-5          |          |                |
| Pearson's r             | 0.99946             |          |                |
| Adj. R-Square           | 0.99878             |          |                |
|                         |                     | Value    | Standard Error |
| C                       | Intercept           | 0.02642  | 0.00164        |
| C                       | Slope               | 35.66808 | 0.41578        |

## 1.4 Investigation of (S)-L2 with (S)- $\alpha$ -phenyl ethylamine

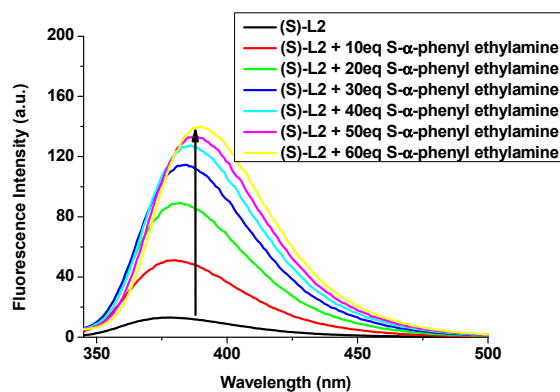

Figure S8. Fluorescence spectra of (S)-L2 with different molar ratio of (S)- $\alpha$ -phenyl ethylamine

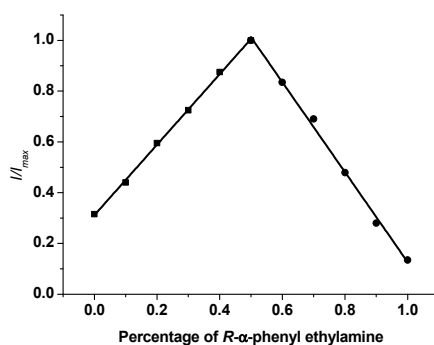

Figure S9. Fluorescence Jobs plot of (S)-L2 and (S)- $\alpha$ -phenyl ethylamine. Total concentration of (S)-L2 and (S)- $\alpha$ -phenyl ethylamine is  $5.0 \times 10^{-5}$  M.

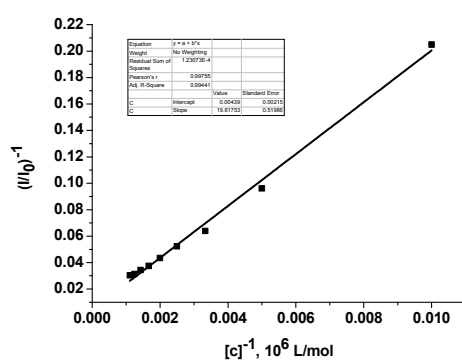

Figure S10. Relationship between  $(I-I_0)^{-1}$  and  $[c]^{-1}$ . I: fluorescence intensity of (S)-L2 with (S)- $\alpha$ -phenyl ethylamine.  $I_0$ : fluorescence intensity of (S)-L2 without (S)- $\alpha$ -phenyl ethylamine ( $1.0 \times 10^{-5}$  M in toluene);  $[c]$ : concentration of (S)- $\alpha$ -phenyl ethylamine in mixed solution.

**Table S2:** Parameters of the fitting curve in **Fig. S10**.

|                         |                     |          |                |
|-------------------------|---------------------|----------|----------------|
| Equation                | $y = a + b \cdot x$ |          |                |
| Weight                  | No Weighting        |          |                |
| Residual Sum of Squares | 1.23073E-4          |          |                |
| Pearson's r             | 0.99755             |          |                |
| Adj. R-Square           | 0.99441             |          |                |
|                         |                     | Value    | Standard Error |
| C                       | Intercept           | 0.00439  | 0.00215        |
|                         | Slope               | 19.61753 | 0.51986        |

## 2. Fluorescence spectrum of (*S*)-L1 with other guest molecules.

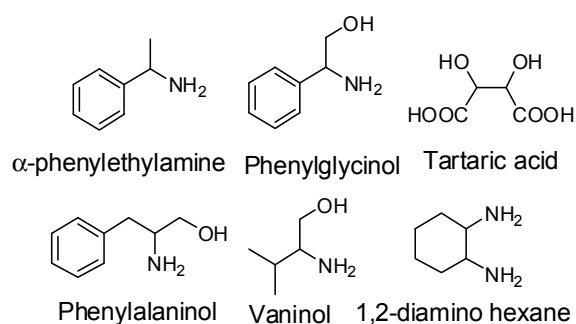

**Scheme 1.** Chiral guests used in the investigation of enantioselective recognition

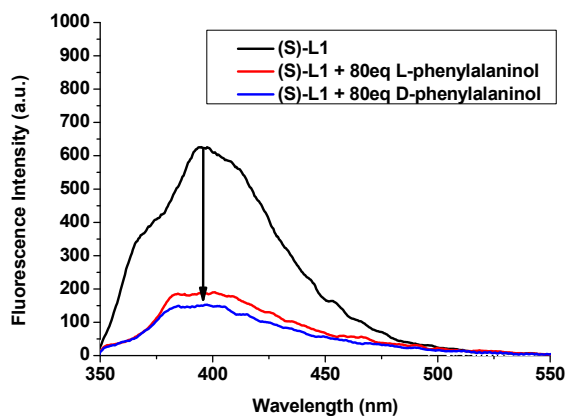

**Figure S11.** Fluorescence emission spectra of (*S*)-L1 ( $1.0 \times 10^{-5}$  mol/L in toluene) towards (*L*)/(*D*)-phenylalaninol ( $1.0 \times 10^{-2}$  mol/L in THF)

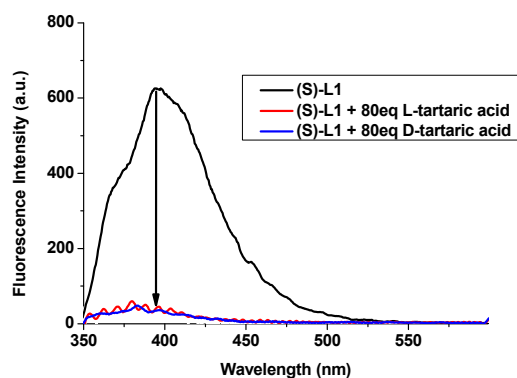

**Figure S12.** Fluorescence emission spectra of (*S*)-L1 ( $1.0 \times 10^{-5}$  mol/L in toluene) towards (*L*)/(*D*)-tartaric acid ( $1.0 \times 10^{-2}$  mol/L in THF)

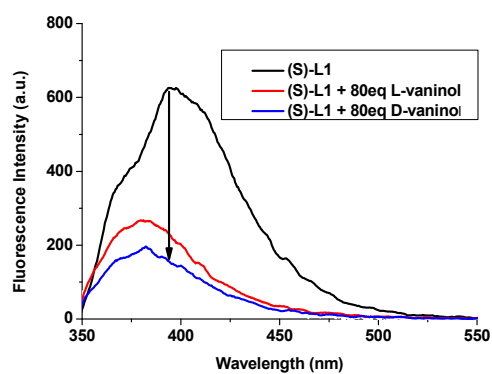

**Figure S13.** Fluorescence emission spectra of (*S*)-L1 ( $1.0 \times 10^{-5}$  mol/L in toluene) towards (*L*)/(*D*)-vaninol ( $1.0 \times 10^{-2}$  mol/L in THF)

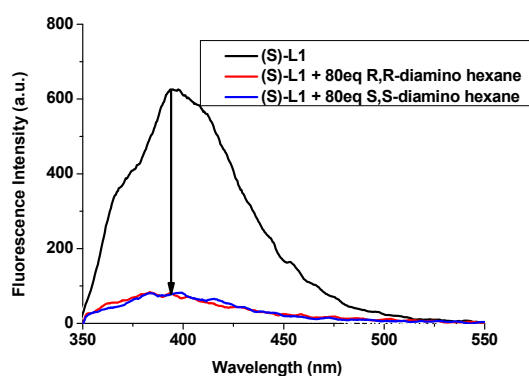

**Figure S14.** Fluorescence emission spectra of (*S*)-L1 ( $1.0 \times 10^{-5}$  mol/L in toluene) towards (*R,R*)/(*S,S*)-diamino hexane ( $1.0 \times 10^{-2}$  mol/L in THF)

### 3. Fluorescence spectrum of (*S*)-L2 with other guest molecules.

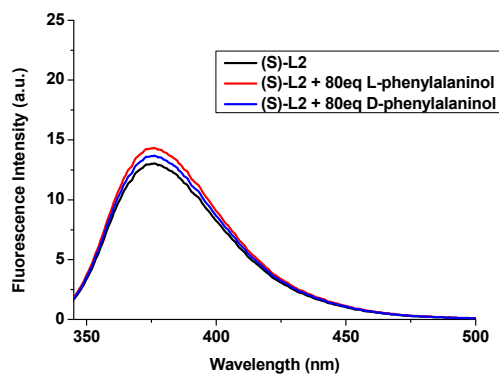

**Figure S15.** Fluorescence emission spectra of (*S*)-L2 ( $1.0 \times 10^{-5}$  mol/L in toluene) towards (*L*)/(*D*)-phenylalaninol ( $1.0 \times 10^{-2}$  mol/L in THF)

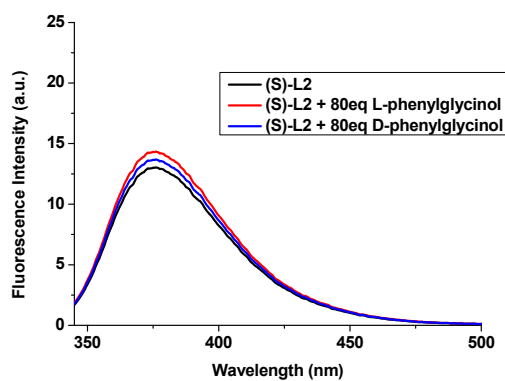

**Figure S16.** Fluorescence emission spectra of (*S*)-L2 ( $1.0 \times 10^{-5}$  mol/L in toluene) towards (*L*)/(*D*)-phenylglycinol ( $1.0 \times 10^{-2}$  mol/L in THF)

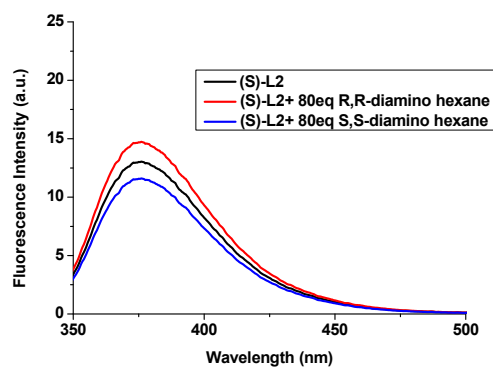

**Figure S17.** Fluorescence emission spectra of (*S*)-L2 ( $1.0 \times 10^{-5}$  mol/L in toluene) towards (*R,R*)/(*S,S*)-diamino hexane ( $1.0 \times 10^{-3}$  mol/L in THF)



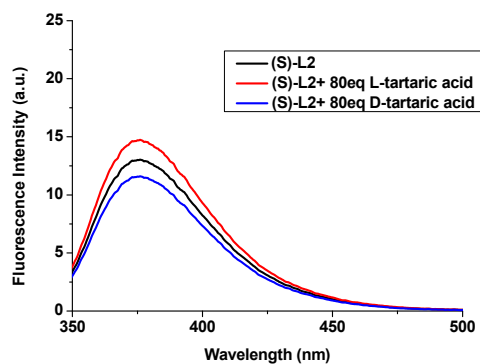

**Figure S18.** Fluorescence emission spectra of (*S*)-L2 ( $1.0 \times 10^{-5}$  mol/L in toluene) towards (*L*)/(*D*)-tartaric acid ( $1.0 \times 10^{-2}$  mol/L in THF)

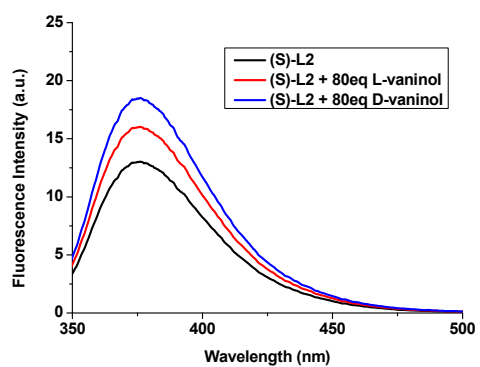

**Figure S19.** Fluorescence emission spectra of (*S*)-L2 ( $1.0 \times 10^{-5}$  mol/L in toluene) towards (*L*)/(*D*)-vanillin ( $1.0 \times 10^{-2}$  mol/L in THF)

#### 4. NMR spectra.

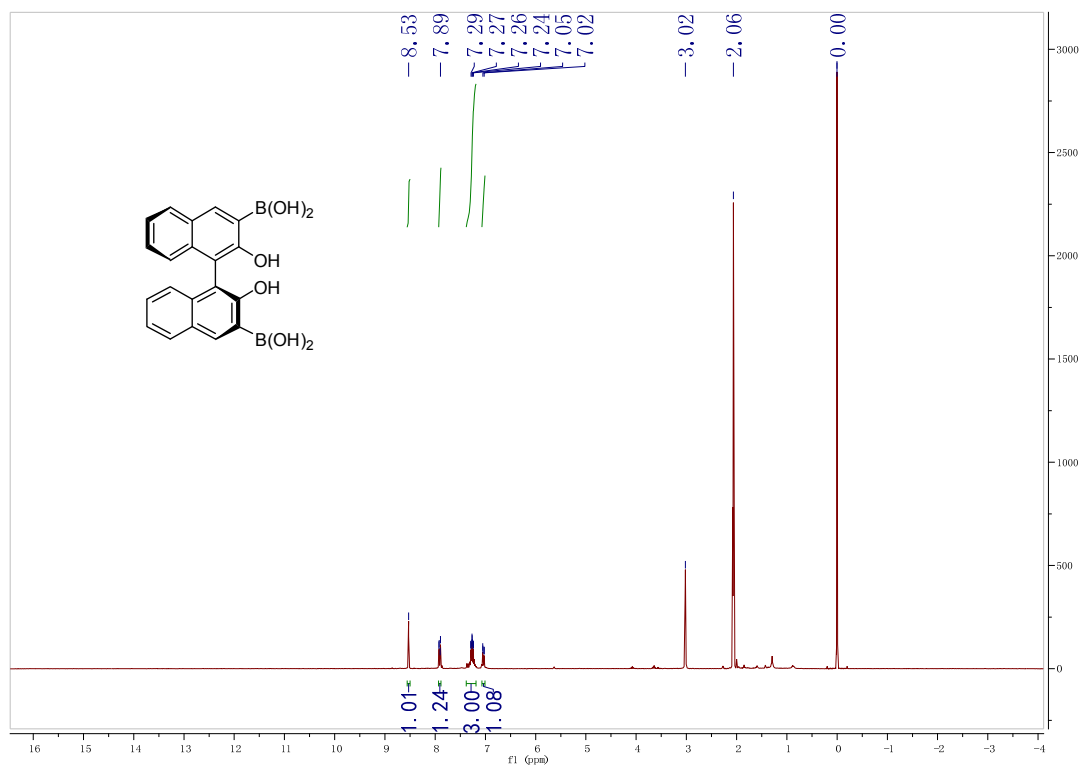

Figure S20.  $^1\text{H}$  NMR of **3** ( $d_6$ -Acetone)

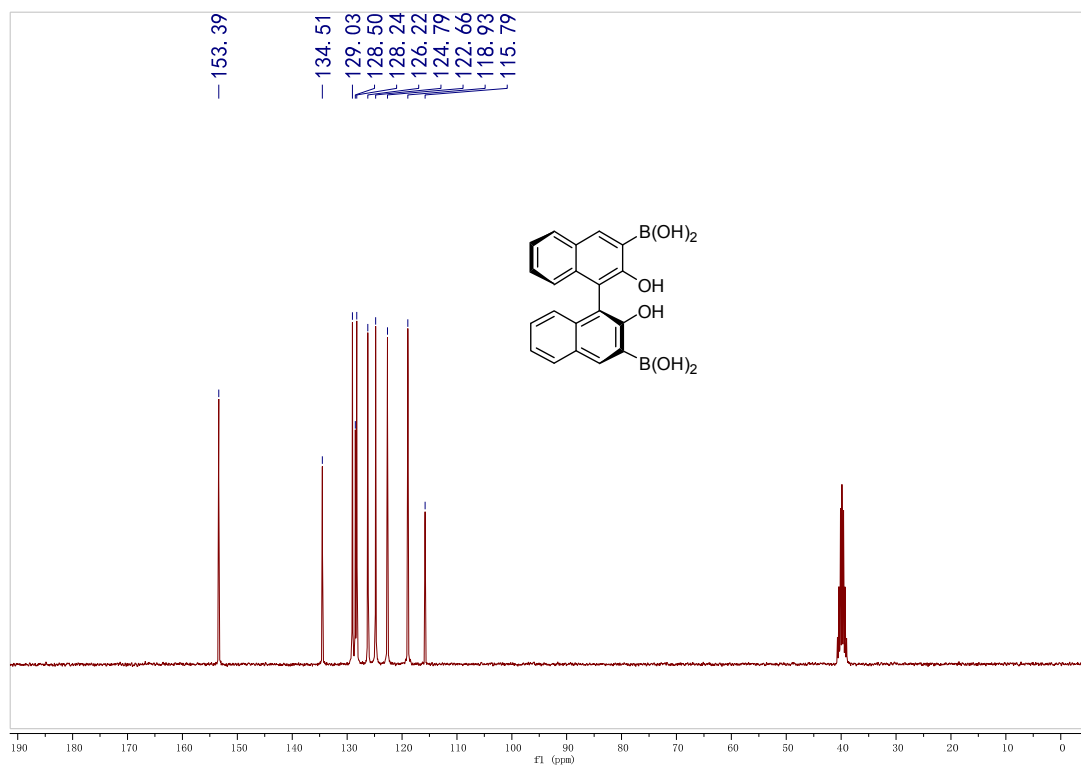

Figure S21.  $^{13}\text{C}$  NMR of **3** ( $d_6$ -DMSO)

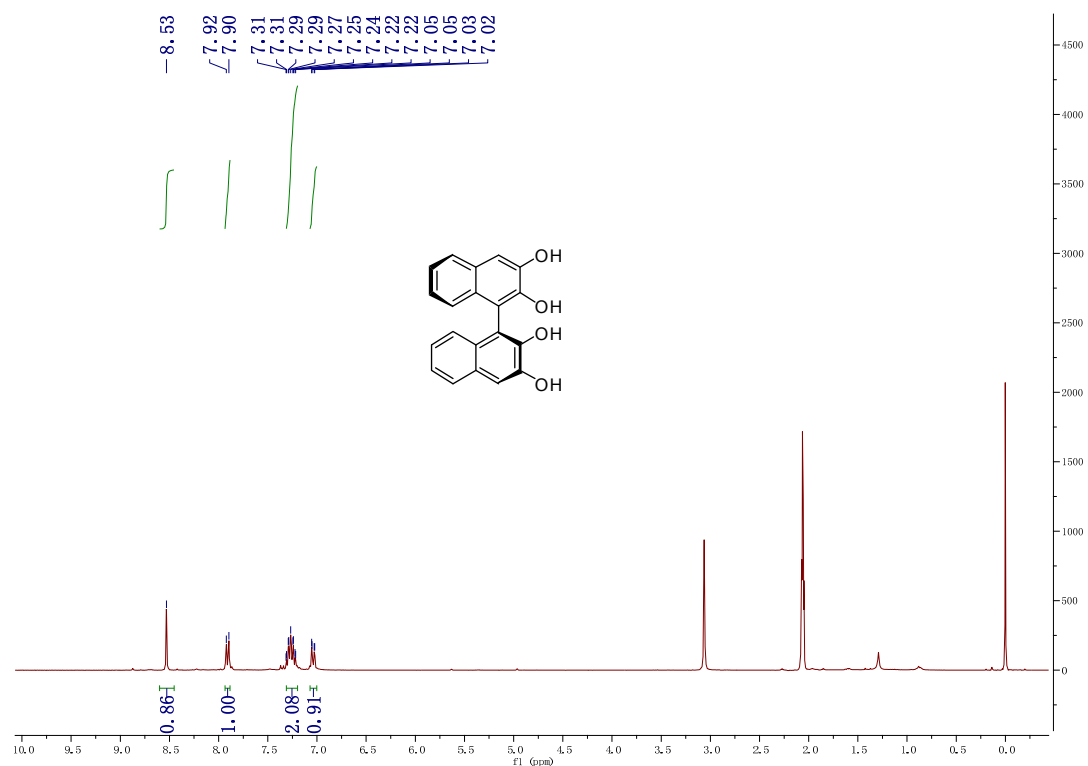

Figure S22.  $^1\text{H}$  NMR of 4 ( $d_6$ -DMSO)

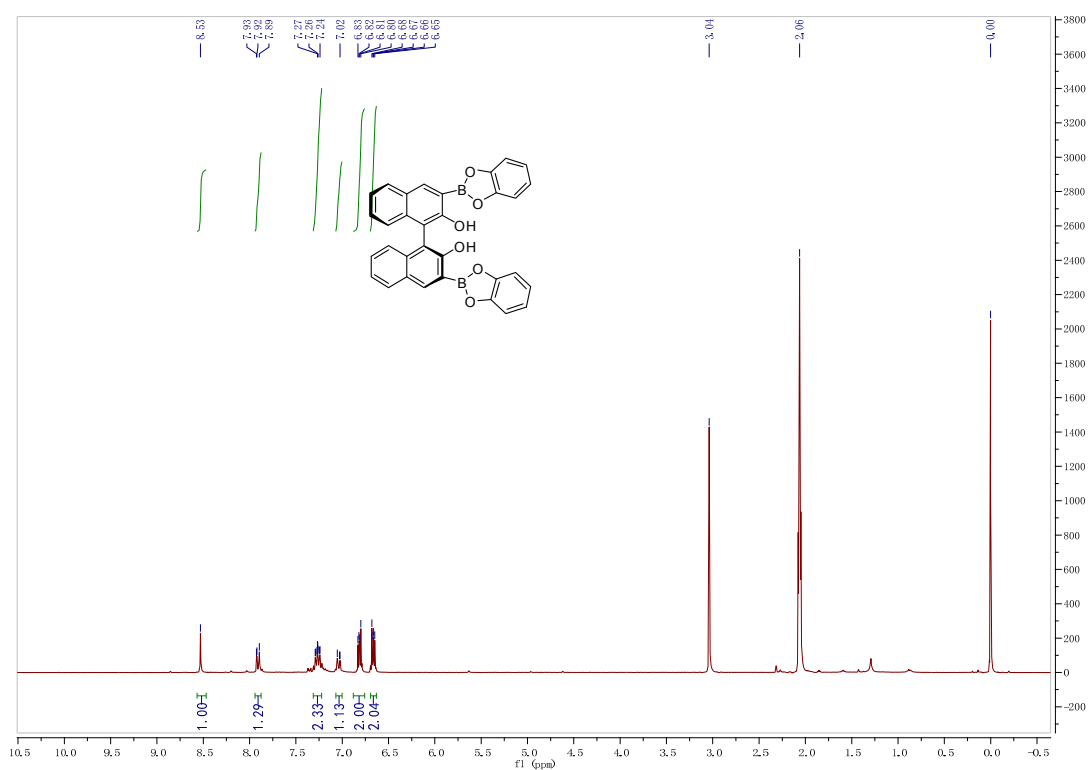

Figure S23.  $^1\text{H}$  NMR of (S)-L1 ( $d_6$ -Acetone)

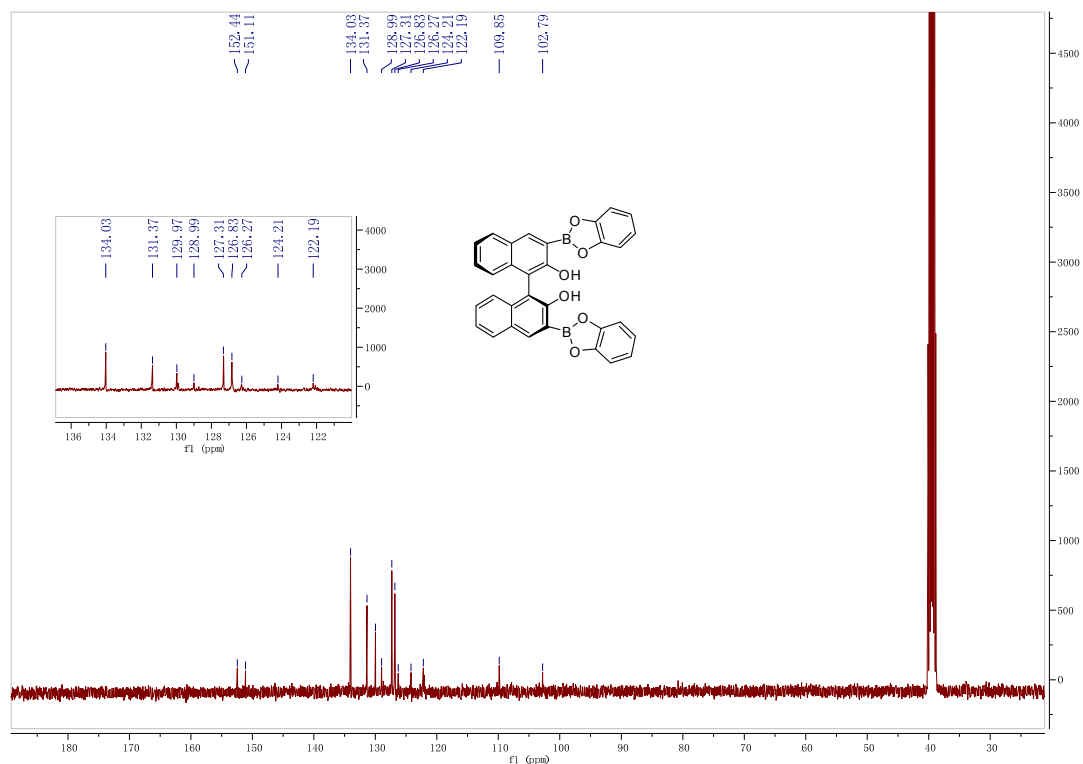

Figure S24.  $^{13}\text{C}$  NMR of (S)-L1 ( $d_6$ -DMSO)

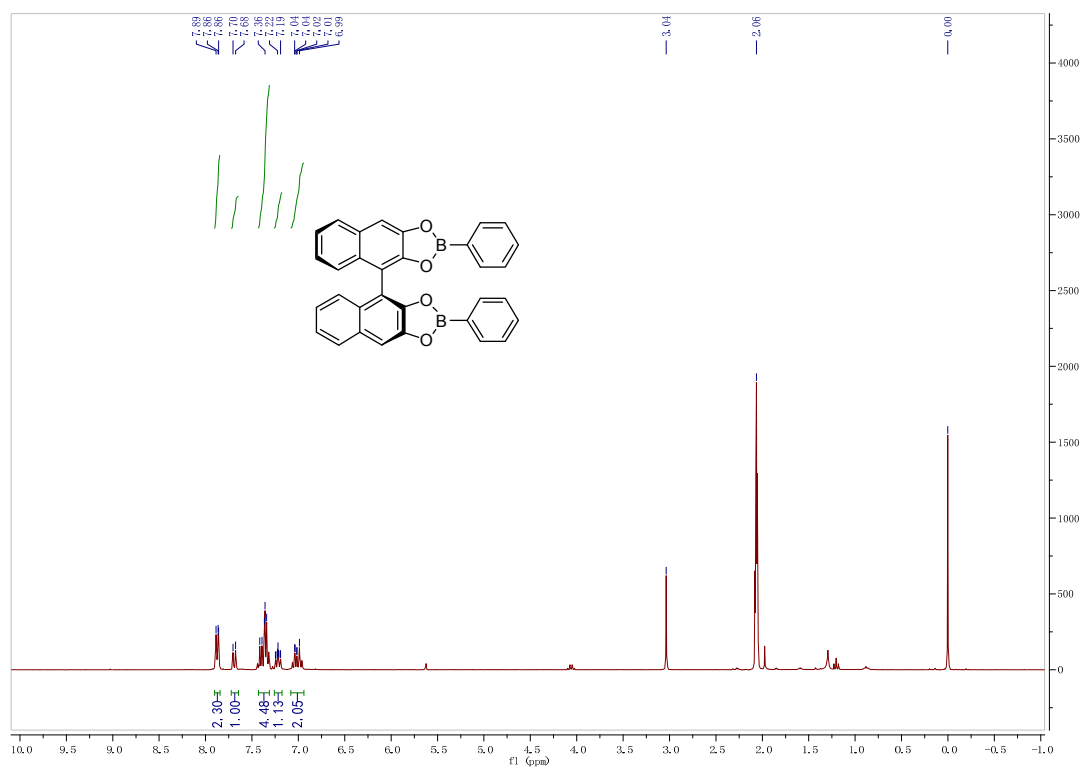

Figure S25.  $^1\text{H}$  NMR of (S)-L2 ( $d_6$ -Acetone)

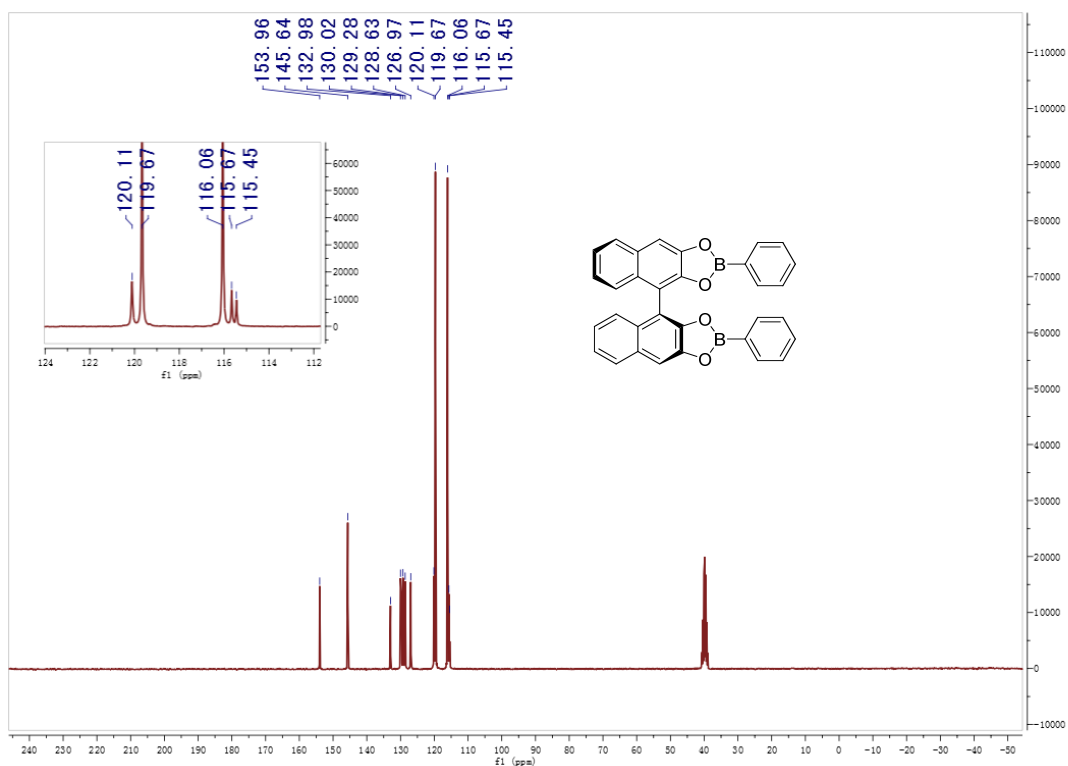

Figure S26.  $^{13}\text{C}$  NMR of (*S*)-L2 ( $d_6$ -DMSO)

## 5. IR spectra

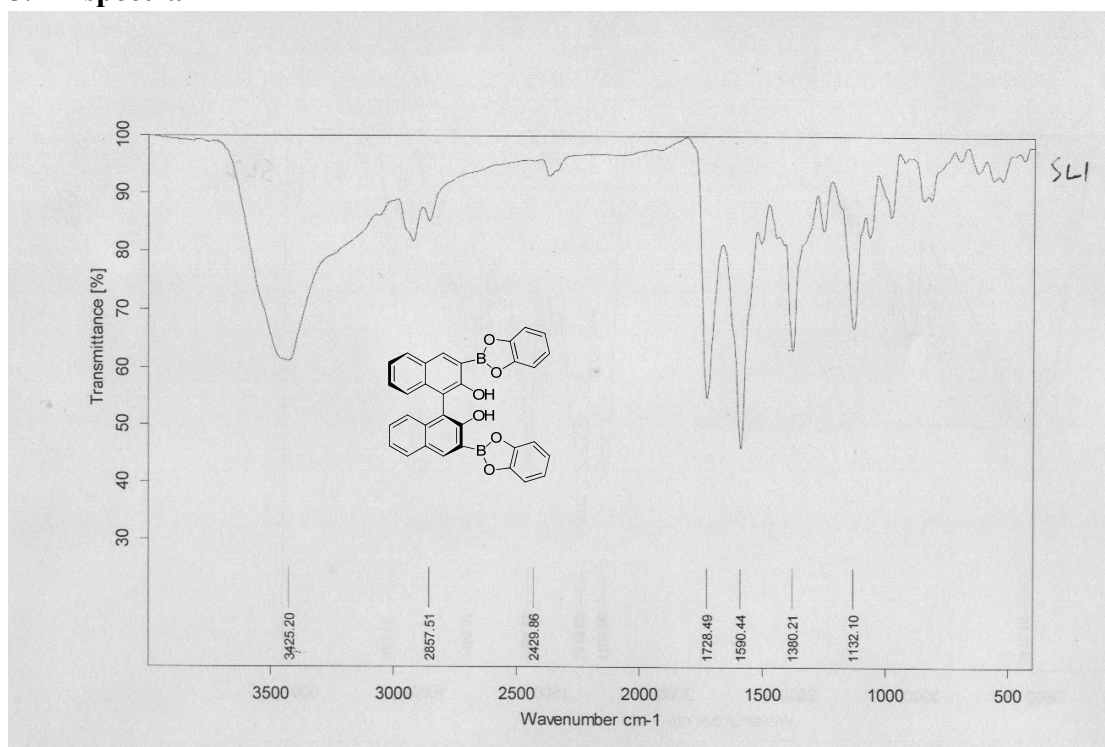

Figure S27. IR spectrum of (*S*)-L1

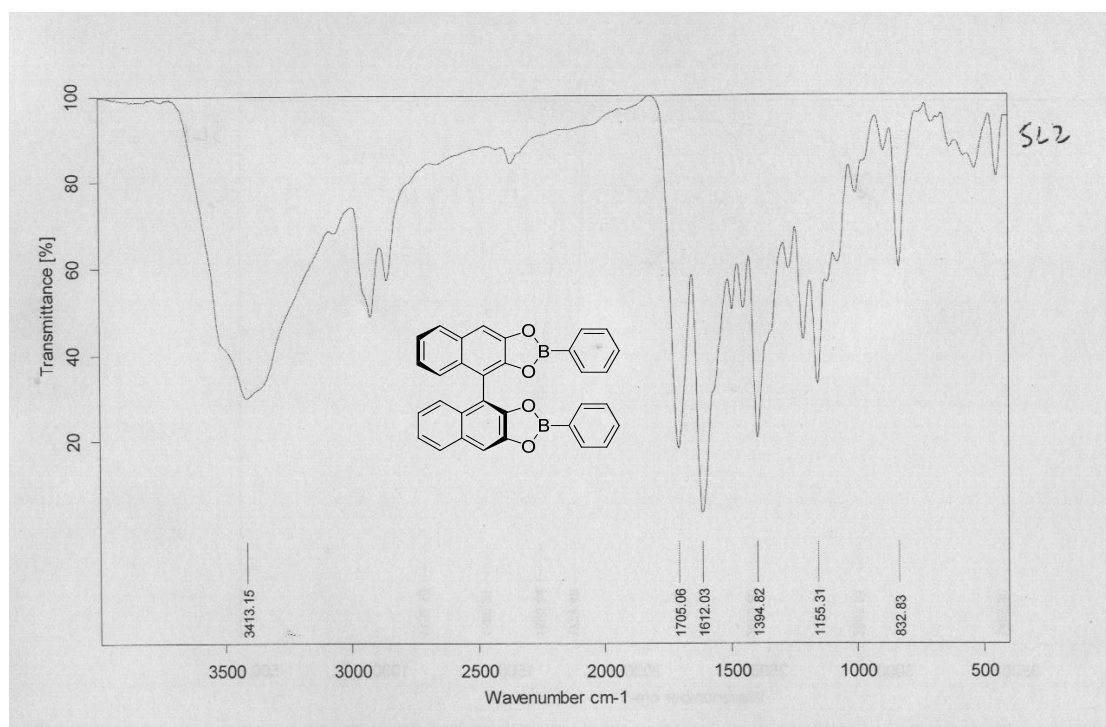

Figure S28. IR spectrum of (S)-L2

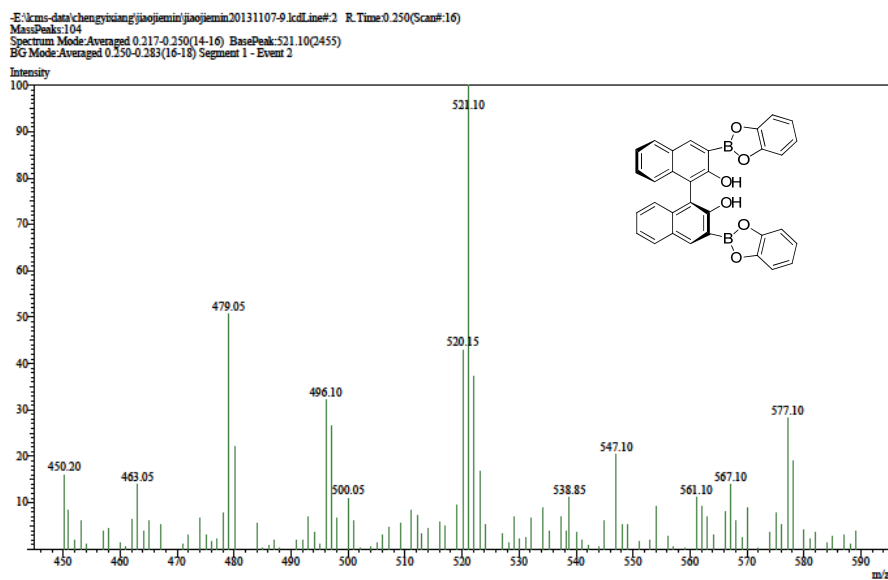

Figure S29. ESI-MS of (S)-L1, [C<sub>32</sub>H<sub>20</sub>B<sub>2</sub>O<sub>6</sub> - H]<sup>-</sup> calcd 521.14; found 521.10.

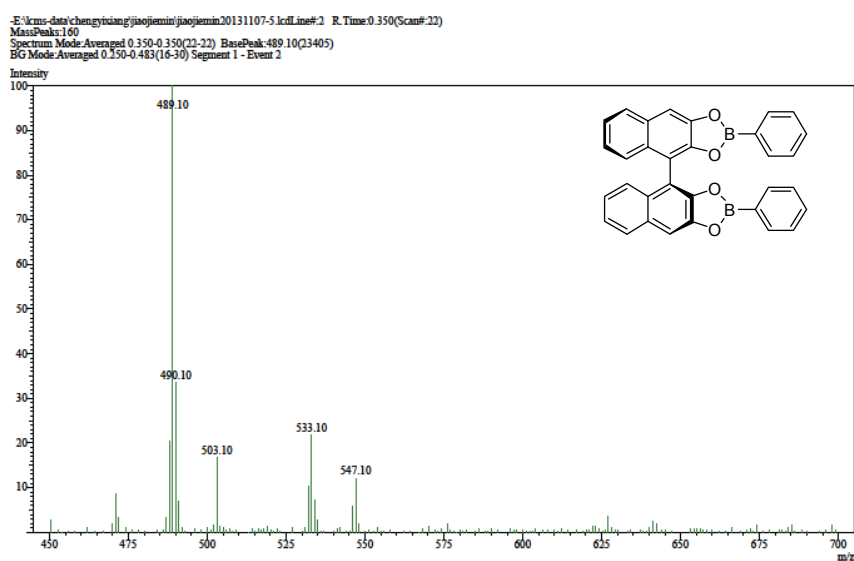

**Figure S30.** ESI-MS of (S)-L2,  $[\text{C}_{32}\text{H}_{20}\text{B}_2\text{O}_4 - \text{H}]^-$  Calcd 489.15; found 489.10.

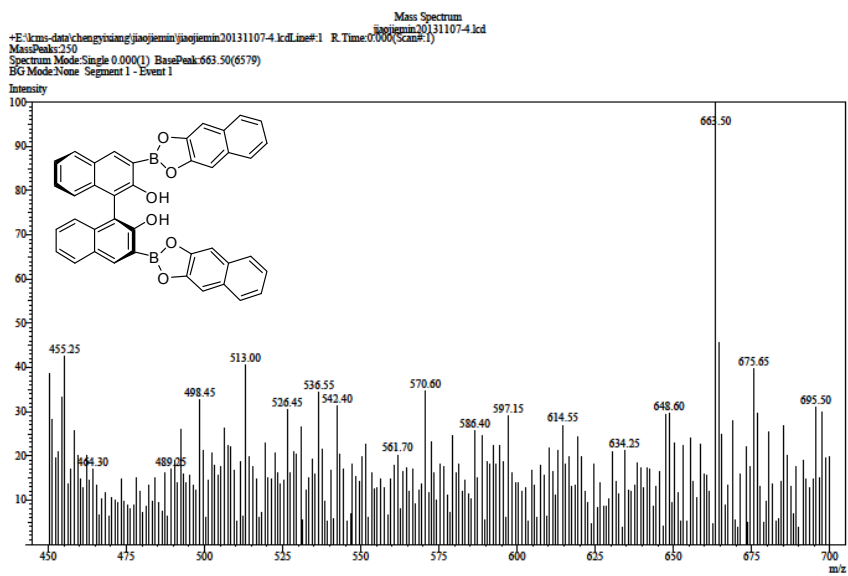

**Figure S31.** ESI-MS of (S)-L3,  $[\text{C}_{40}\text{H}_{24}\text{B}_2\text{O}_6 + \text{H}_2\text{O} + \text{Na}]^+$  Calcd 663.18; found 663.50.

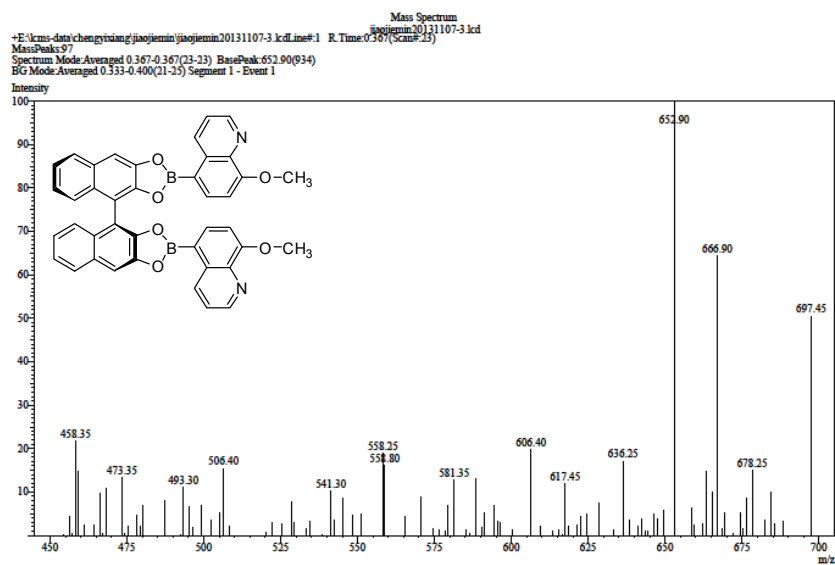

**Figure S32.** ESI-MS of (S)-L4,  $[C_{40}H_{26}B_2N_2O_6 + H]^+$  Calcd 653.08; found 652.90.



## 6. $^1\text{H}$ NMR study of (*S*)-L1 and (*S*)-L2

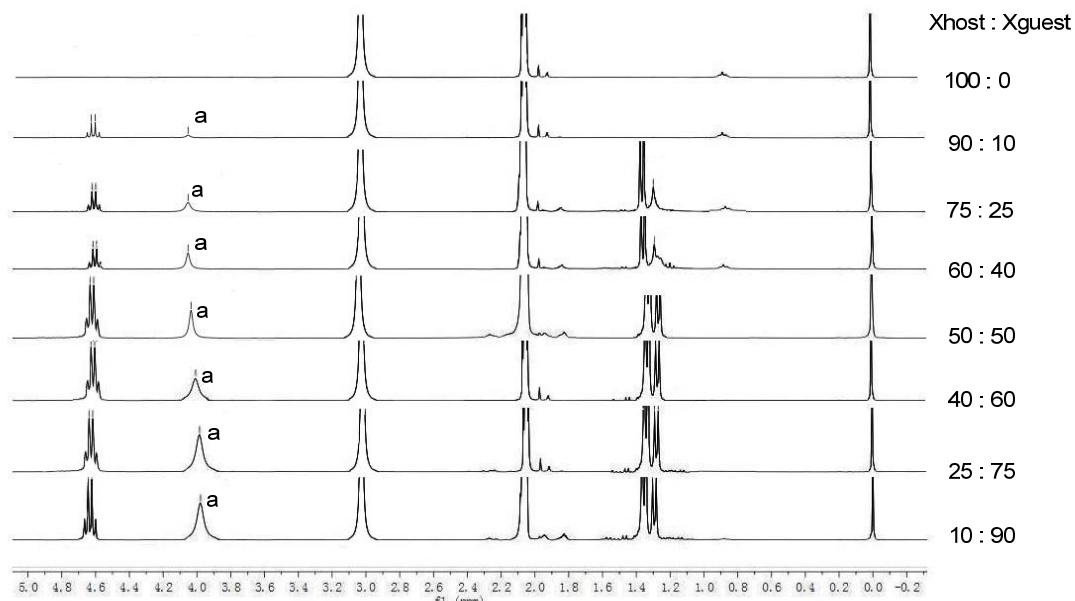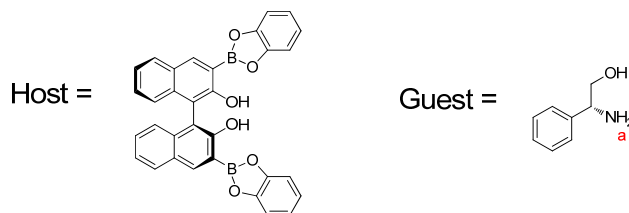

**Figure S33.** Partial  $^1\text{H}$  NMR spectrum of (*S*)-L1 + (*D*)-phenylglycinol (in  $\text{d}_6$ -Acetone). The total concentration of (*S*)-L1 and (*D*)-phenylglycinol remains at  $2.0 \times 10^{-4}$  mol/L.

The  $^1\text{H}$  NMR spectra of (*S*)-L1 was determined as addition of (*D*)-phenylglycinol in different molar ratios. The H signal of amino group of guest compound (labeled as **a**) was shifted upfield upon addition of host compound from  $\delta = 3.98$ , and reached largest value at  $\delta = 4.06$ . This could be attributed to that B atom of host molecule played its role as electron acceptor, and amino group of guest played its role as electron donor.

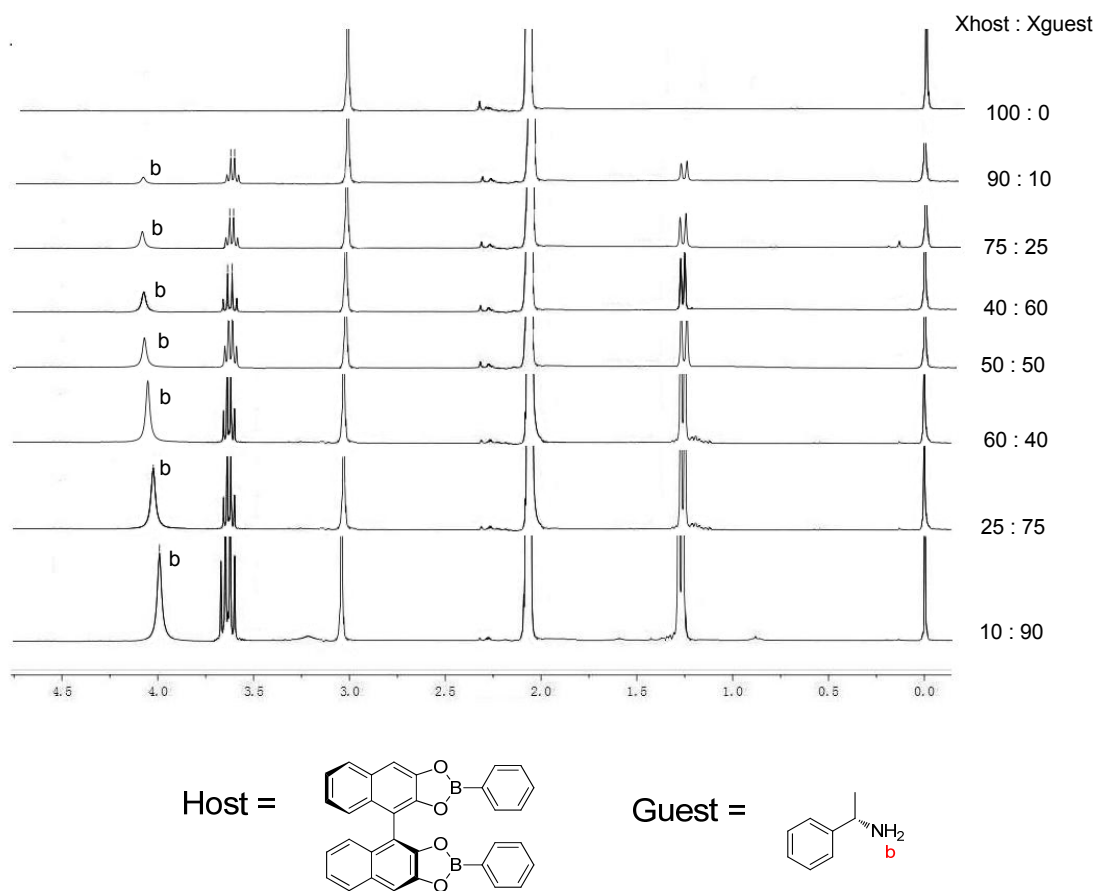

**Figure S34.** Partial  $^1\text{H}$  NMR spectrum of (*S*)-**L2** + (*S*)- $\alpha$ -phenyl ethylamine (in  $d_6$ -Acetone). The total concentration of (*S*)-**L2** and (*S*)- $\alpha$ -phenyl ethylamine remains at  $1.0 \times 10^{-4}$  mol/L.

The  $^1\text{H}$  NMR spectra of (*S*)-**L2** was also determined as addition of (*S*)- $\alpha$ -phenyl ethylamine in different molar ratios. The H signal of amino group of guest compound (labeled as **b**) was shifted upfield upon addition of host compound from  $\delta = 4.01$ , and reached largest value at  $\delta = 4.13$ . This could be attributed to the similar mechanism in (*S*)-**L1**.

## 7. UV-vis spectrum of (*S*)-L2 with phenyl amine

Herein, we further investigated UV-vis study of (*S*)-L2 towards both enantiomers of phenyl ethylamine. As demonstrated in Figure S29, we found that UV-vis spectrum of sensor (*S*)-L2 exhibits two absorption peaks situated at 288 nm and 322 nm, respectively. No obvious UV-vis absorbance change could be observed upon addition of (*R*)-phenyl ethylamine. However, the absorption peak at long wavelength region of 322 nm shows a little enhancement while sensor (*S*)-L2 was treated with (*S*)-phenyl ethylamine, indicating that sensor (*S*)-L2 exhibited higher coordinative effect upon (*S*)-phenyl ethylamine rather than (*R*)-phenyl ethylamine, which is coincident with fluorescence enantioselective recognition behavior.

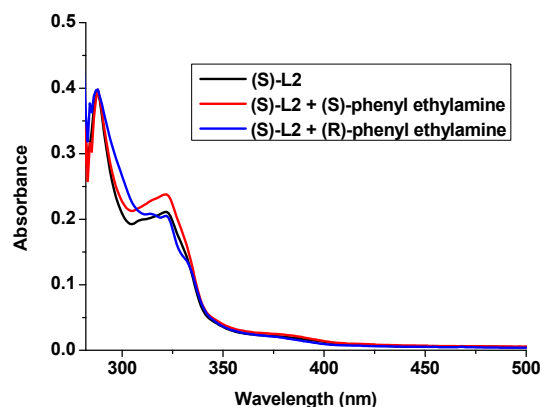

Figure S35. UV-vis spectra of (*S*)-L2 ( $0.5 \times 10^{-6}$  mol/L in  $\text{CHCl}_3$ ) towards (*R*)- and (*S*)- $\alpha$ -phenyl ethylamine ( $1.0 \times 10^{-2}$  mol/L in THF) at 1:100 molar ratio.
